# Supplementary material
Source: Springer Nature journal article supplement (https://www.springermedizin.de/resource/supplementary/12889_2004_225_MOESM2_ESM.pdf/9500698)
Supplement: MOESM2 [file 9500698]

---

## **Transient Outcomes**

- Hepatomegaly
- Splenomegaly
- Jaundice
- Petechia and purpura
- Pneumonitis
- Fetal growth retardation
- Seizures

## **Permanent Outcomes**

- Microcephaly
  - Vision loss
  - Hearing loss
  - Mental retardation
  - Motor disabilities
  - Seizures
  - Death
-
